# Supplementary material
Source: publisher site journal article supplement (https://www.spandidos-publications.com/791/downloadSupplementary)

Figure S1. Polarization effect of macrophages co-cultured with T24 cells. (A) Relative miR-21 expression in macrophages co-cultured with T24 cells. (B) mRNA levels of IL-10 and TGF- $\beta$  in macrophages co-cultured with T24 cells. n=3. \*\*P<0.01, \*\*\*P<0.001 vs. control group. Control, macrophages; Co-T24, macrophages co-cultured with T24 cells; miR-21, microRNA-21.

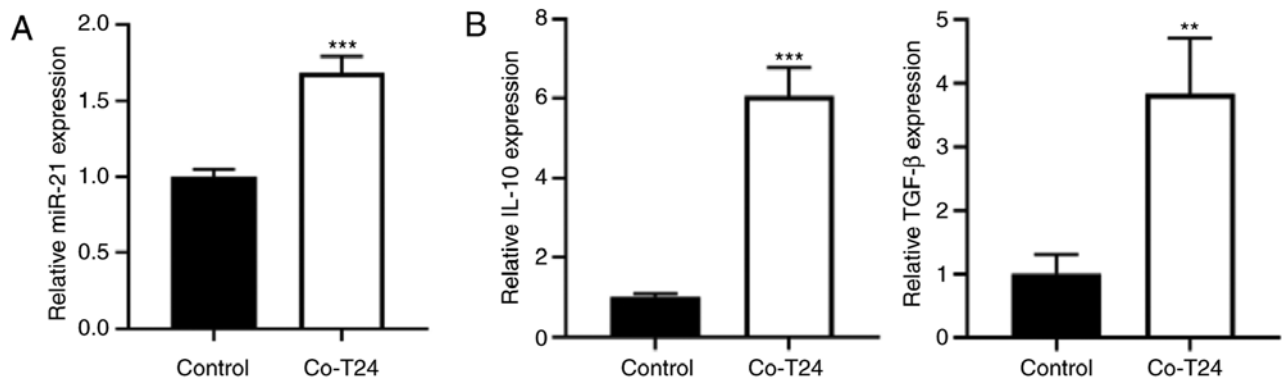

Supplement: Supplementary file 1 [file downloadSupplementary]
